# Supplementary material for: Genomic and transcriptomic changes complement each other in the pathogenesis of sporadic Burkitt lymphoma
Source: Nat Commun. 2019 Mar 29;10:1459. doi: 10.1038/s41467-019-08578-3 (PMC6440956; doi:10.1038/s41467-019-08578-3)
Supplement: Supplementary file 4 — Supplementary Data 1 [file 41467_2019_8578_MOESM4_ESM.xlsx]

## Sheet: Tabelle
Supplementary Data 1. Clinical and molecular characteristics of the analysed BL cohort.
ICGC-cases	Published previously	Age at diagnosis (years)	Sex	Tumor Cell content based on WGS (%)	Classification	Material	Bone marrow involvement (%)	RNA-available	GEP classifier	IHC analysis								RNA-Seq (rpkm value)			RNA-Seq	FISH analysis								WGS analysis		MYC status consensus
										CD10 expression	CD20 expression	Ki67 expression	MUM1 expression	BCL2 expression	BCL6 expression	EBV expression	SOX11 expression	SOX11 expression	MUM1 expression	BCL2 expression	EBV presence	MYC status by FISH	IGH-MYC fusion	MYC break	BCL2 break	BCL6 break	IGH break	IGL-MYC fusion	IGK-MYC fusion	MYC status by WGS (DELLY)	MYC status by WGS (SOPHIA)
4142267	yes2, 4	5	male	94	leukBL	BM	85	yes	mBL	4	4	n.a.	n.a.	n.a.	n.a.	n.a.	n.a.	1.11	28.94	1.2	negative	IGL-MYC pos	negative	positive	negative	negative	negative	positive	n.d.	IGL-MYC pos	IGL-MYC pos	IGL-MYC pos
4178310	no	10	male	73	leukBL	BM	90	yes	non-mBL	n.a.	n.a.	n.a.	n.a.	n.a.	n.a.	n.a.	n.a.	0.17	7.69	3.03	negative	IGL-MYC pos	negative	positive	negative	negative	negative	positive	negative	IGL-MYC pos	IGL-MYC pos	IGL-MYC pos
4178345	no	10	male	30	leukBL	BM	70	yes	non-mBL	n.a.	n.a.	n.a.	n.a.	n.a.	n.a.	n.a.	n.a.	0.83	5.77	3	negative	IGH-MYC pos	positive	positive	negative	negative	positive	n.d.	n.d.	IGH-MYC pos	IGH-MYC pos	IGH-MYC pos
4108627	no	5	male	86	leukBL	BM	85	no	n.a.	n.a.	n.a.	n.a.	n.a.	n.a.	n.a.	n.a.	n.a.	n.a.	n.a.	n.a.	n.a.	IGH-MYC pos	positive	positive	negative	negative	positive	n.d.	n.d.	IGH-MYC pos	IGH-MYC pos	IGH-MYC pos
4161696	no	5	male	30	leukBL	BM	85	no	n.a.	n.a.	n.a.	n.a.	n.a.	n.a.	n.a.	n.a.	n.a.	n.a.	n.a.	n.a.	n.a.	MYC pos*	n.a.	positive	n.a.	n.a.	n.a.	n.d.	n.d.	IGH-MYC pos	IGH-MYC pos	IGH-MYC pos
4190784	no	4	male	87	leukBL	BM	100	no	n.a.	4	4	1	n.a.	1	n.a.	negative	3	n.a.	n.a.	n.a.	n.a.	MYC pos*	n.a.	positive	n.a.	n.a.	n.a.	n.d.	n.d.	IGH-MYC pos	IGH-MYC pos	IGH-MYC pos
4110498	no	8	male	74	leukBL	BM	96	no	n.a.	n.a.	n.a.	n.a.	n.a.	n.a.	n.a.	n.a.	n.a.	n.a.	n.a.	n.a.	n.a.	IGH-MYC pos	positive	positive	negative	negative	positive	n.d.	n.d.	IGH-MYC pos	IGH-MYC pos	IGH-MYC pos
4164943	no	7	female	68	leukBL	BM	98	no	n.a.	n.a.	n.a.	n.a.	n.a.	n.a.	n.a.	n.a.	n.a.	n.a.	n.a.	n.a.	n.a.	IGH-MYC pos	positive	positive	negative	negative	positive	n.d.	n.d.	IGH-MYC pos	IGH-MYC pos	IGH-MYC pos
4152611	no	7	male	39	leukBL	BM	90	no	n.a.	n.a.	n.a.	n.a.	n.a.	n.a.	n.a.	n.a.	n.a.	n.a.	n.a.	n.a.	n.a.	n.a.*	n.a.	n.a.	n.a.	n.a.	n.a.	n.d.	n.d.	IGH-MYC pos	IGH-MYC pos	IGH-MYC pos
4119027	yes1, 2, 3, 4	12	male	91	solBL	LN	0	yes	mBL	4	4	1	0	0	4	negative	4	10.79	3.37	0.4	negative	IGH-MYC pos	positive	positive	negative	negative	positive	n.d.	n.d.	IGH-MYC pos	IGH-MYC pos	IGH-MYC pos
4125240	yes1, 2, 3, 4	4	male	85	solBL	LN	0	yes	mBL	4	4	1	0	1	3	n.a.	n.a.	12.88	26.58	0.56	negative	IGH-MYC pos	positive	positive	negative	negative	positive	n.d.	n.d.	IGH-MYC pos	IGH-MYC pos	IGH-MYC pos
4182393	yes1, 2, 3, 4	10	male	95	solBL	LN	0	yes	mBL	4	n.a.	1	4	0	4	negative	3-4	5,59	13.24	0.36	negative	IGH-MYC pos	positive	positive	negative	negative	positive	n.d.	n.d.	IGH-MYC pos	IGH-MYC pos	IGH-MYC pos
4190495	yes1, 2, 3, 4	15	male	85	solBL	LN	0	yes	mBL	n.a.	4	0.9	n.a.	0	n.a.	negative	n.a.	2.61	13.09	2.69	negative	IGL-MYC pos	negative	positive	negative	negative	negative	positive	n.d.	negative	IGL-MYC pos	IGL-MYC pos
4112512	yes2, 3, 4	18	female	92	solBL	LN	0	yes	mBL	4	4	1	0	0	4	negative	4	7.41	0.85	0.79	negative	IGH-MYC pos	positive	positive	negative	negative	positive	n.d.	n.d.	IGH-MYC pos	IGH-MYC pos	IGH-MYC pos
4133511	yes2, 3, 4	5	male	80	solBL	LN	0	yes	mBL	4	4	1	0	0	4	negative	4	9.54	0.89	0.8	negative	IGH-MYC pos	positive	positive	negative	negative	positive	n.d.	n.d.	IGH-MYC pos	IGH-MYC pos	IGH-MYC pos
4177856	yes2, 3, 4	10	male	96	solBL	LN	0	yes	mBL	4	4	1	0	0	4	n.a.	n.a.	1.09	3.49	0.48	negative	IGH-MYC pos	positive	positive	negative	negative	positive	n.d.	n.d.	IGH-MYC pos	IGH-MYC pos	IGH-MYC pos
4189998	yes2, 3, 4	13	male	100	solBL	LN	0	yes	mBL	4	4	1	2	0	4	negative	4	3.23	7.29	0.76	negative	IGH-MYC pos	positive	positive	negative	negative	positive	n.d.	n.d.	IGH-MYC pos	IGH-MYC pos	IGH-MYC pos
4193278	yes2, 3, 4	17	male	95	solBL	LN	0	yes	mBL	4	4	1	3	0	2	negative	0	1.09	14.55	1.26	negative	IGK-MYC pos	negative	positive	negative	negative	negative	negative	positive	IGK-MYC pos	IGK-MYC pos	IGK-MYC pos
4194218	yes2, 3, 4	4	male	90	solBL	LN	0	yes	mBL	4	4	0.9	0	2	3	negative	n.a.	1.58	16.69	0.855	negative	IGH-MYC pos	positive	positive	negative	negative	positive	n.d.	n.d.	IGH-MYC pos	IGH-MYC pos	IGH-MYC pos
4194891	yes2, 3, 4	4	male	82	solBL	LN	0	yes	mBL	4	4	1	0	0	3	negative	n.a.	9.64	24.06	1.14	negative	IGH-MYC pos	positive	positive	negative	negative	positive	n.d.	n.d.	IGH-MYC pos	IGH-MYC pos	IGH-MYC pos
4127766	yes3	8	male	85	solBL	LN	0	yes	mBL	4	4	0.9	2	0	1	negative	0	10.2	21.54	0.64	negative	IGH-MYC pos	positive	positive	negative	negative	positive	n.d.	n.d.	IGH-MYC pos	IGH-MYC pos	IGH-MYC pos
4130003	yes3	6	male	84	solBL	LN	0	yes	mBL	4	4	0.9	1	1	3	negative	0	1.15	18.44	5.94	negative	IGL-MYC pos	negative	positive	negative	negative	negative	positive	n.d.	IGL-MYC pos	IGL-MYC pos	IGL-MYC pos
4146289	yes3	14	male	40	solBL	LN	0	yes	mBL	4	4	1	4	0	4	negative	4	0.1	7.95	1.63	negative	IGH-MYC pos	positive	positive	negative	negative	positive	n.d.	n.d.	IGH-MYC pos	IGH-MYC pos	IGH-MYC pos
4162611	no	16	male	91	solBL	LN	0	yes	mBL	4	4	0.9	n.a.	0	4	negative	3	9.13	15.27	1.13	negative	IGH-MYC pos	positive	positive	negative	negative	positive	n.d.	n.d.	IGH-MYC pos	IGH-MYC pos	IGH-MYC pos
4170844	no	5	female	63	solBL	LN	0	no	n.a.	4	4	1	n.a.	2	4	negative	0	n.a.	n.a.	n.a.	n.a.	n.a.*	n.a.	n.a.	n.a.	n.a.	n.a.	n.d.	n.d.	IGH-MYC pos	IGH-MYC pos	IGH-MYC pos
4174742	no	4	female	36	solBL	LN	19	no	n.a.	4	4	0.8	4	3	3	negative	3-4	n.a.	n.a.	n.a.	n.a.	n.a.*	n.a.	n.a.	n.a.	n.a.	n.a.	n.d.	n.d.	IGH-MYC pos	IGH-MYC pos	IGH-MYC pos
4198478	no	7	male	90	solBL	LN	0	no	n.a.	4	4	1	n.a.	0	n.a.	n.a.	0	n.a.	n.a.	n.a.	n.a.	IGH-MYC pos	positive	positive	negative	negative	positive	n.d.	n.d.	IGH-MYC pos	IGH-MYC pos	IGH-MYC pos
4156551	no	8	male	48	solBL	LN	0	no	n.a.	4	4	1	1	0	n.a.	negative	4	n.a.	n.a.	n.a.	n.a.	IGH-MYC pos	positive	positive	negative	negative	positive	n.d.	n.d.	IGH-MYC pos	IGH-MYC pos	IGH-MYC pos
4158769	no	6	male	89	solBL	LN	4	no	n.a.	4	4	1	4	0	n.a.	negative	4	n.a.	n.a.	n.a.	n.a.	n.a.*	n.a.	n.a.	n.a.	n.a.	n.a.	n.d.	n.d.	IGH-MYC pos	IGH-MYC pos	IGH-MYC pos
4163741	no	3	male	88	solBL	LN	0	yes	mBL	4	4	0.9	n.a.	0	n.a.	negative	n.a.	5.29	13.14	2.07	negative	IGH-MYC pos	positive	positive	negative	negative	positive	n.d.	n.d.	IGH-MYC pos	IGH-MYC pos	IGH-MYC pos
4100314	no	5	male	85	solBL	LN	0	no	n.a.	4	4	n.a.	n.a.	1	4	negative	2	n.a.	n.a.	n.a.	n.a.	n.a.*	n.a.	n.a.	n.a.	n.a.	n.a.	n.d.	n.d.	IGH-MYC pos	IGH-MYC pos	IGH-MYC pos
4190231	no	12	male	80	solBL	LN	0	no	n.a.	4	4	n.a.	1	0	4	negative	4	n.a.	n.a.	n.a.	n.a.	n.a.*	n.a.	n.a.	n.a.	n.a.	n.a.	n.d.	n.d.	IGH-MYC pos	IGH-MYC pos	IGH-MYC pos
4110996	yes3	2	male	86	solBL	LN	0	yes	mBL	4	4	1	1	1	4	negative	n.a.	0.54	21.8	4.24	negative	IGH-MYC pos	positive	positive	negative	negative	positive	n.d.	n.d.	IGH-MYC pos	IGH-MYC pos	IGH-MYC pos
4177434	yes3	16	female	100	solBL	LN	0	yes	mBL	n.a.	4	1	4	2	4	negative	0	1.54	20.93	4.74	negative	IGH-MYC pos	positive	positive	negative	negative	positive	n.d.	n.d.	MYC-ASIC2	MYC-ASIC2	IGH-MYC pos
4186812	no	9	male	87	solBL	LN	0	yes	mBL	4	4	1	4	0	n.a.	n.a.	n.a.	14.71	22.7	0.98	negative	n.a.*	n.a.	n.a.	n.a.	n.a.	n.a.	n.d.	n.d.	IGH-MYC pos	IGH-MYC pos	IGH-MYC pos
4178518	no	10	male	72	solBL	LN	90	yes	n.r.	n.a.	n.a.	n.a.	n.a.	n.a.	n.a.	negative	3	3.96	17.35	1.21	negative	IGH-MYC pos	positive	positive	negative	negative	positive	n.d.	n.d.	IGH-MYC pos	IGH-MYC pos	IGH-MYC pos
4190316	no	11	female	95	pleuraBL	Effu.	0	no	n.a.	n.a.	n.a.	n.a.	n.a.	n.a.	n.a.	n.a.	n.a.	n.a.	n.a.	n.a.	n.a.	MYC pos*	n.a.	positive	n.a.	n.a.	n.a.	n.d.	n.d.	IGH-MYC pos	IGH-MYC pos	IGH-MYC pos
4103570	no	7	male	95	pleuraBL	Effu.	0	no	n.a.	n.a.	n.a.	n.a.	n.a.	n.a.	n.a.	n.a.	n.a.	n.a.	n.a.	n.a.	n.a.	MYC pos*	n.a.	positive	n.a.	n.a.	n.a.	n.d.	n.d.	IGL-MYC pos	IGL-MYC pos	IGL-MYC pos
4152036	no	14	male	39	pleuraBL	Effu.	0	no	n.a.	4	4	1	1	1	4	negative	1	n.a.	n.a.	n.a.	n.a.	n.a.*	n.a.	n.a.	n.a.	n.a.	n.a.	n.d.	n.d.	IGH-MYC pos	IGH-MYC pos	IGH-MYC pos
1Richter et al., 2013; 2Alexandrov et al., 2013; 3Doose et al., 2015; 4Kretzmer et al., 2015
*IGH-MYC detected by WGS
n.a.: not available; n.r: not results
solBL: solid BL; leukBL: leukemia BL; pleuraBL: pleura BL; pos: positive; WGS: whole genome sequencing; GEP: gene expression profile; IHC: immunohistochemistry; FISH: fluorescent in situ hybridization
LN: lymph node; BM: bone marrow; Effu: effusion; mBL: molecular BL; non-mBL: non molecular BL; EBV: Epstein-Barr-Virus
