# Supplementary material for: Genomic and transcriptomic changes complement each other in the pathogenesis of sporadic Burkitt lymphoma
Source: Nat Commun. 2019 Mar 29;10:1459. doi: 10.1038/s41467-019-08578-3 (PMC6440956; doi:10.1038/s41467-019-08578-3)
Supplement: Supplementary file 5 — Supplementary Data 2 [file 41467_2019_8578_MOESM5_ESM.xlsx]

## Sheet: flagstats.BL
Supplementary Data 2. Statistics of whole genome sequencing and RNA-Seq.
ICGC-case		Whole genome sequencing				RNA-Seq
	Material	Classification	Total read count	Total reads mapped (%)	Properly paired (%)	Total read count	Total reads mapped (%)	Properly paired (%)
4108627	tumor	leukBL	1673039048	99.83	89.52	n.d.	n.d.	n.d.
4108627	germline	.	3355982182	99.74	75.38	.	.
4110498	tumor	leukBL	1280366766	99.57	94.32	n.d.	n.d.	n.d.
4110498	germline	.	1311494142	99.56	94.30	.	.	.
4142267	tumor	leukBL	1218575152	99.77	86.60	138554688	99.97	93.96
4142267	germline	.	1080403635	99.81	92.40	.	.	.
4152611	tumor	leukBL	1065720590	99.82	91.55	n.d.	n.d.	n.d.
4152611	germline	.	1069716379	99.79	92.06	.	.	.
4161696	tumor	leukBL	2081647170	99.83	92.30	n.d.	n.d.	n.d.
4161696	germline	.	1422485137	99.83	94.25	.	.	.
4164943	tumor	leukBL	1322500084	99.84	91.23	n.d.	n.d.	n.d.
4164943	germline	.	1795431926	99.85	94.14	.	.	.
4178310	tumor	leukBL	1234983561	99.89	94.40	130546694	99.99	95.66
4178310	germline	.	1218364240	99.88	94.52	.	.	.
4178345	tumor	leukBL	1315680319	99.85	92.30	130973362	100.00	96.88
4178345	germline	.	1380730591	99.83	92.95	.	.	.
4190784	tumor	leukBL	1427151652	99.87	92.55	n.d.	n.d.	n.d.
4190784	germline	.	1531702524	99.85	92.72	.	.	.
4103570	tumor	pleuraBL	1163337767	99.23	90.25	n.d.	n.d.	n.d.
4103570	germline	.	1391289152	99.90	86.32	.	.	.
4152036	tumor	pleuraBL	996746163	99.41	89.14	n.d.	n.d.	n.d.
4152036	germline	.	1862505215	99.85	87.88	.	.	.
4190316	tumor	pleuraBL	1235959193	99.83	90.52	n.d.	n.d.	n.d.
4190316	germline	.	1296528385	99.84	89.73	.	.	.
4100314	tumor	solBL	1341522174	99.82	87.30	n.d.	n.d.	n.d.
4100314	germline	.	1289224926	99.82	87.97	.	.	.
4110996	tumor	solBL	1401206964	99.76	91.79	110190126	99.99	97.03
4110996	germline	.	1965702416	99.88	92.86	.	.	.
4112512	tumor	solBL	1115594475	99.84	94.61	95956101	99.71	96.2
4112512	germline	.	1266510823	99.75	93.43	.	.	.
4119027	tumor	solBL	1253024985	99.76	95.29	117556127	99.90	96.4
4119027	germline	.	1111632304	99.81	94.71	.	.	.
4125240	tumor	solBL	1369631818	99.79	86.46	110109843	99.86	93.01
4125240	germline	.	1652082803	99.67	88.89	.	.	.
4127766	tumor	solBL	1320827670	99.78	91.80	164107714	99.95	93.49
4127766	germline	.	1207316715	99.80	91.09	.	.	.
4130003	tumor	solBL	2054719488	99.78	91.34	119356183	99.95	94.45
4130003	germline	.	2032138847	99.55	91.74	.	.	.
4133511	tumor	solBL	1215056653	99.86	93.70	171394738	99.98	94.99
4133511	germline	.	965582962	99.82	94.23	.	.	.
4146289	tumor	solBL	1425460700	99.79	92.60	178770846	99.97	91.91
4146289	germline	.	1088545869	99.70	92.43	.	.	.
4156551	tumor	solBL	1294864847	99.82	91.46	n.d.	n.d.	n.d.
4156551	germline	.	1681528327	99.88	94.55	.	.	.
4158769	tumor	solBL	1329370736	99.82	89.72	n.d.	n.d.	n.d.
4158769	germline	.	1908644767	99.84	94.21	.	.	.
4162611	tumor	solBL	1193932764	99.88	93.56	130237244	100.00	96.12
4162611	germline	.	1148565124	99.88	93.52	.	.	.
4163741	tumor	solBL	1376876326	99.94	88.02	160901831	99.99	95.61
4163741	germline	.	1308545054	99.95	86.55	.	.	.
4170844	tumor	solBL	1711050890	99.84	93.35	n.d.	n.d.	n.d.
4170844	germline	.	1500266880	99.78	91.30	.	.	.
4174742	tumor	solBL	1342114419	99.84	91.84	n.d.	n.d.	n.d.
4174742	germline	.	1335866631	99.85	93.38	.	.	.
4177434	tumor	solBL	1510243011	99.79	89.69	124907399	99.96	95.88
4177434	germline	.	1242063325	99.86	93.33	.	.	.
4177856	tumor	solBL	1079227598	99.81	93.54	140215405	99.98	94.97
4177856	germline	.	1183341879	99.76	91.34	.	.	.
4178518	tumor	solBL	949195623	99.39	90.41	163299330	99.99	95.15
4178518	germline	.	1451485464	99.52	84.04	.	.	.
4182393	tumor	solBL	1299370764	99.72	91.68	130097570	99.97	96.66
4182393	germline	.	1501426643	99.82	91.83	.	.	.
4186812	tumor	solBL	1008659132	99.76	93.56	153463546	99.91	98.69
4186812	germline	.	973266497	99.76	93.29	.	.	.
4189998	tumor	solBL	1531394928	99.80	87.90	159808891	99.99	94.82
4189998	germline	.	1499864952	99.80	87.65	.	.	.
4190231	tumor	solBL	1315939280	99.82	88.62	n.d.	n.d.	n.d.
4190231	germline	.	1248218544	99.82	88.87	.	.	.
4190495	tumor	solBL	1164843725	99.73	91.08	122743160	99.99	96.95
4190495	germline	.	1308330631	99.79	91.65	.	.	.
4193278	tumor	solBL	1168856331	99.81	93.97	161634277	99.96	93.46
4193278	germline	.	1479565171	99.85	93.70	.	.	.
4194218	tumor	solBL	1525838410	99.84	91.77	139466359	99.95	93.73
4194218	germline	.	1431782140	99.85	92.99	.	.	.
4194891	tumor	solBL	1452529055	99.84	91.19	160156112	99.96	93.86
4194891	germline	.	1449875138	99.83	91.75	.	.	.
4198478	tumor	solBL	1505653052	99.74	91.09	n.d.	n.d.	n.d.
4198478	germline	.	1347516722	99.85	92.44	.	.	.
				Median total reads mapped (%) tumor: 99.82		Median total reads: 138,554,688	Median total reads mapped (%) tumor: 99.76
				Median total reads mapped (%) germline: 99.82
n.d.: not done, cases without RNA available.
solBl: solid BL; leukBL: leukemia BL; pleuraBL: pleura BL

## Sheet: Tabelle1
data
138554688
130546694
130973362
110190126
95956101
117556127
110109843
164107714
119356183
171394738
178770846
130237244
160901831
124907399
140215405
163299330
130097570
153463546
159808891
122743160
161634277
139466359
160156112
138554688
