# Supplementary material for: Genomic and transcriptomic changes complement each other in the pathogenesis of sporadic Burkitt lymphoma
Source: Nat Commun. 2019 Mar 29;10:1459. doi: 10.1038/s41467-019-08578-3 (PMC6440956; doi:10.1038/s41467-019-08578-3)
Supplement: Supplementary file 6 — Supplementary Data 3 [file 41467_2019_8578_MOESM6_ESM.xlsx]

## Sheet: Breakpoints
Supplementary Data 3. IG-MYC breakpoints and MYC expression pattern of BL cohort.
ICGC-case	Disease	Age	Gender	Localization of the disease	chr.8 genomic position	MYC gene	Breaks in MYC	chr. Partner	chr. Partner genomic position	Breakpoint position	Features of breakpoint and V segment	Ig-remodeling process involved in translocation event	Remarks	MYC mRNA expression	IG-MYC fusion transcript	Remarks
4112512	solBL	18	female	abdominal	128748128	upstream	Class II	14	106056231	switch IgA2 region		CSR		Canonical	no
					128748137	upstream	Class II	14	106056222	switch IgA2 region
4190231	solBL	12	male	abdominal	128748027	upstream	Class II	14	106056264	switch IgA2 region		CSR		n.a.	n.a.
					128748053	upstream	Class II	14	106056238	switch IgA2 region
4110996	solBL	2	male	abdominal	128748825	5´UTR	Class I	14	106056664	switch IgA2 region		CSR		Alternative	yes	From der(14) antisense transcript through Sα region reading through breakpoint into 5’ UTR of MYC
					128748805	5´UTR	Class I	14	106057277	switch IgA2 region
4152036	pleuraBL	19	male	pleura	128748026	upstream	Class II	14	106056838	switch IgA2 region		CSR		n.a.	n.a.
					128748026	upstream	Class II	14	106057601	switch IgA2 region
4146289	solBL	14	male	abdominal	128748883	Intron 1-2	Class I	14	106057056	switch IgA2 region		CSR		Alternative
4170844	solBL	5	female	cervical	128748123	upstream	Class II	14	106177018	switch IgA1 region		CSR		n.a.	n.a.
					128748153	upstream	Class II	14	106177009	switch IgA1 region
4133511	solBL	5	male	abdominal	128748851	Exon 1	Class I	14	106177036	switch IgA1 region		CSR		Alternative	yes	Two antisense transcript from der(14): - antisense transcript through Sα region reading through breakpoint into 5’ UTR of exon 1 of MYC. - antisense transcript through MYC spliced to exon 1 of IgA
					128748835	5´UTR	Class I	14	106177047	switch IgA1 region
4158769	solBL	6	male	n.a.	128749586	Intron 1-2	Class I	14	106177161	switch IgA1 region		n.a.		n.a.	n.a.
4186812	solBL	9	male	abdominal	128747562	upstream	Class II	14	106212650	switch IgG1 region		CSR		Canonical	no	From der (8) fusion transcript between IgG1 switch region and exon 1 of CASC11
					128747584	upstream	Class II	14	106211085	switch IgG1 region
4119027	solBL	12	male	abdominal	128747914	upstream	Class II	14	106211836	switch IgG1 region		CSR		Canonical	yes	From der(14) antisense transcript starting 3’ of IgM of unknown origin reading through breakpoint into exon 3 of MYC
					128747917	upstream	Class II	14	106211423	switch IgG1 region
4162611	solBL	16	male	cervical	128748198	upstream	Class II	14	106212487	switch IgG1 region		CSR		Canonical	yes	From der(14) anti-sense transcript through MYC extending into the IgH locus, which is transcribed in the normal orientation
					128748210	upstream	Class II	14	106212432	switch IgG1 region
4100314	solBL	5	male	cervical	128748095	upstream	Class II	14	106,239,969	switch IgG3 region		CSR		n.a.	n.a.
					128748099	upstream	Class II	14	106240303	switch IgG3 region
4178518	solBL	10	male	n.a.	128748320	5´UTR	Class I	14	106240126	switch IgG3 region		CSR		Canonical	yes	From der(14) fusion transcript through genomic breakpoint, orientation unclear
					128748329	5´UTR	Class I	14	106240101	switch IgG3 region
4127766	solBL	8	male	abdominal	128927222	downstream	n.a.	14	106302422	switch IgG3 region		n.a.		Canonical	no
4125240	solBL	4	male	abdominal	128749327	Intron 1-2	Class I	14	106326648	switch IgM region		CSR		Alternative	no
					128749356	Intron 1-2	Class I	14	106324109	switch IgM region
4152611	leukBL	7	male	BM	128748753	5´UTR	Class I	14	106324197	switch IgM region		CSR	der (14)t(8;14)(q24;q32)	n.a.	n.a.
					128748760	5´UTR	Class I	14	106324214	switch IgM or IgA2
4156551	solBL	8	male	jaw	128748609	5´UTR	Class I	14	106324895	switch IgM region		CSR		n.a.	n.a.
					128748623	5´UTR	Class I	14	106324887	switch IgM region
4108627	leukBL	5	female	BM	128749147	Intron 1-2	Class I	14	106324904	switch IgM region		CSR		n.a.	n.a.
					128749158	Intron 1-2	Class I	14	106176030	not identified
4198478	solBL	7	male	abdominal	128748709	5´UTR	Class I	14	106325516	switch IgM region		CSR		n.a.	n.a.
4190316	pleuraBL	11	female	pleura	128749002	Intron 1-2	Class I	14	106,325,717	switch IgM region		CSR		n.a.	n.a.
					128749009	Intron 1-2	Class I	14	106325690	switch IgM region
4161696	leukBL	5	male	BM	128749682	Intron 1-2	Class I	14	106325764	switch IgM region		CSR		n.a.	n.a.
					128749687	Intron 1-2	Class I	14	106326019	switch IgM region
4174742	solBL	4	female	cervical	128748322	5´UTR	Class I	14	106326317	switch IgM region		CSR		n.a.	n.a.
					128748326	5´UTR	Class I	14	106325906	switch IgM region
4182393	solBL	10	male	abdominal	128748132	upstream	Class II	14	106325998	switch IgM region		CSR		Canonical	yes	From der(14): fusion transcript from upstream of MYC into switch IgM region, direction unclear From der(8): three fusion transcript transcriptional orientation as VDJ gene 1. Transcript from JH5 to cryptic splice site in CASC11 2. Transcript from IGHM switch region into CASC11 3. Transcript from JH6 to cryptic splice site in CASC11
					128748148	upstream	Class II	14	106325580	switch IgM region
4194891	solBL	4	male	abdominal	128747910	upstream	Class II	14	106,326,294	switch IgM region		CSR		Canonical	yes	From der(14): fusion transcript between IGHM switch region and upstream region of MYC, orientation unclear From der(8): two transcripts, iwht same orientation as VDJ gene 1. Fusion transcript from JH6 to cryptic splice site in CASC11 2. Fusion transcript from IGHM switch region into CASC11
					128747919	upstream	Class II	14	106326261	switch IgM region
4110498	leukBL	8	male	BM	128746988	upstream	Class II	14	106326478	switch IgM region		CSR		n.a.
4178345	leukBL	11	male	BM	128748309	upstream	Class II	14	106326933	switch IgM region		CSR		Canonical	no	From der(8) two transcripts: - trancript from JH4 to cryptic splice site in CASC11 - transcript from Sμ into CASC11,
4194218	solBL	4	male	abdominal	128749078	Intron 1-2	Class I	14	106329936	JH5-JH6 intron	no N nucleotides, 1 point mutation	SHM		Alternative	yes	From der(14) three transcripts: - transcript from JH locus to 5´UTR in exon 1 of MYC, orientation unclear - antisense transcript from MYC through exon 1 of IGHD - antisense trnascript from MYC through exon 1 of IGHM
					128749098	Intron 1-2	Class I	14	106329940	JH5-JH6 intron	no N nucleotides, 1 point mutation
4164943	leukBL	7	female	BM	128748797	5´UTR	Class I	14	106494449	beginning of CDR1 in IGHV2-5	unmutated; no N nucleotides	SHM	both breaks away from RSS sites	n.a.	n.a.
					128748811	5´UTR	Class I	14	n.a.	JH4-JH5 intron	no N nucleotides		deletion of DNA from CDR1 of IGHV2-5 to intron between JH4 and JH5
4190784	leukBL	4	male	BM	128747614	upstream	Class II	14	106452801	beginning of FR3 of IGHV1-2	unmutated, 2 bp at break not assigned	SHM	boh breaks away from RSS sites	n.a.	n.a.
					128747632	upstream	Class II	14	106330378	JH4-JH5 intron	1 point mutation, 2 bp at break not assigned		deletion of DNA from FR3 of IGHV1-2 to intron between JH4 and JH5
4177856	solBL	10	male	cervical	128748704	5´UTR	Class I	14	106725268	FR3 (codon 85) of IGHV3-23	V gene is mutated; no N nucleotides	SHM	exact break in both translocations in codon 85	Canonical	no
					128748708	5´UTR	Class I	14	106330424	FR3 (codon 85) of IGHV3-23	V gene is mutated; no N nucleotides
4189998	solBL	13	male	abdominal	128748010	upstream	Class II	14	106330425	n.a.		n.a.		Canonical	no
					128748012	upstream	Class II	14	n.a.	n.a.
4163741	solBL	3	male	jaw	128748982	Intron 1-2	Class I	14	106452834	codon 51 (beginning FR3) of IGHV1-2	1 point mutation, no N nucleotides	SHM		Alternative	yes	From der(14) fusion transcript between MYC intron 1 and codon 42 in FR2 of IGHV1-2 gene; orientation unclear
					128748999	Intron 1-2	Class I	14	106452854	codon 42 (in FR2) of IGHV1-2	several mutations, 1 bp at break not assigned
4193278	solBL	17	male	axillar	128756510	downstream	n.a.	2	89597775	280 bp upstream of VK1-37		SHM or VDJ recombination	deletion of VkJk rearrangement and	Canonical	no
					128756509	downstream	n.a.	2	89158315	between JK5 and IGKC			neighboring sequences
4178310	leukBL	10	male	BM	128754528	downstream	n.a.	22	22735485	codon 22 of IGLV1-44 (FR1)	no N nucleotides	SHM		Canonical	no
					128754530	downstream	n.a.	22	22735494	codon 24 of IGLV1-44 (FR1)	no N nucleotides, 2 point mutations
4142267	leukBL	5	male	BM	128806582	downstream	n.a.	22	?	68 bp downstream of Jlambda3	no N nucleotides, no mutations	SHM		Canonical	no
					128806584	downstream	n.a.	22	23247303	98 bp downstream of Jlambda 3	no N nucleotides, no mutations
4130003	solBL	6	male	pharyngeal	129186146	downstream	n.a.	22	23247402	197 bp 3' of IGLJ2	2 bp at break not assigned; somatic point mutations and a deletion	SHM		Canonical	no
					129186156	downstream	n.a.	22	23247451	200 bp 3' of IGLJ2	no N nucleotides, no mutations
4103570	pleuraBL	7	male	pleura	128753697	downstream	n.a.	22	22550623	codon 94 of IGLV6-57	no N nucleotides, 1 point mutation	SHM or VDJ recombination	19 codons away from RSS site	n.a.	n.a.
					128753700	downstream	n.a.	22	23247168	IGLJ3 at 5' end of J segment	5 bp not assigned (N nucleotides?), no mutation:		break could be RAG-associated, with deletion at end of IGLV segment
4190495	solBL	15	male	abdominal	129184959	downstream	n.a.	22	23242442	607 bp 3' of IGLJ2	no N nucleotides, no mutations	SHM		Canonical	no
					129184970	downstream	n.a.	22	23247819	533 bp 3' of IGLJ2	no N nucleotides, 2 candidate mutations near 5' end
4177434	solBL	16	female	abdominal	128764086	downstream	n.a.	17	32,108,065	no Ig partner			MYC partner is from chromosome 17, ASIC2 gene	Alternative	no
For the cases with two different breakpoint position, the breakpoint located in der(14)t(8;14)(q24;q32) was used for the analysis.
chr.: chromosome
n.a.: not available
CSR: class switch recombination; SHM: somatic hypermutations
