# Supplementary material for: Genomic and transcriptomic changes complement each other in the pathogenesis of sporadic Burkitt lymphoma
Source: Nat Commun. 2019 Mar 29;10:1459. doi: 10.1038/s41467-019-08578-3 (PMC6440956; doi:10.1038/s41467-019-08578-3)
Supplement: Supplementary file 7 — Supplementary Data 4 [file 41467_2019_8578_MOESM7_ESM.xlsx]

## Sheet: Events in MYC gene
Supplementary Data 4. Single nucleotide variants and structural variants detected within the MYC locus.
Patient ID	Position (hg19)	Ref.	Alt.	Annovar Function	Variant Type	Break in MYC	MYC_ mRNA	Canonical Transcript	Alternative Transcript	CDS position	Prediced protein change	PTMs close region	SIFT (score)	PolyPhen-2 (score)
4190784	128747807	G	A	upstream	SNV	Class II	n.a.
4189998	128747987	T	C	upstream	SNV	Class II	Canonical
4190784	128747997	G	T	upstream	SNV	Class II	n.a.
4178518	128748314	G	T	upstream	SNV	Class I	Canonical
4189998	128748378	C	T	exonic UTR5	SNV	Class II	Canonical
4190231	128748402	T	C	exonic UTR5	SNV	Class II	n.a.
4127766	128748468	G	A	exonic UTR5	SNV	n.a. (downs.)	Canonical
4189998	128748475	C	G	exonic UTR5	SNV	Class II	Canonical
4182393	128748479	C	CTCG	exonic UTR5	INDEL	Class II	Canonical
4190784	128748483	C	T	exonic UTR5	SNV	Class II	n.a.
4190231	128748484	T	C	exonic UTR5	SNV	Class II	n.a.
4190231	128748493	T	C	exonic UTR5	SNV	Class II	n.a.
4190231	128748497	G	C	exonic UTR5	SNV	Class II	n.a.
4182393	128748528	G	A	exonic UTR5	SNV	Class II	Canonical
4177434	128748543	C	T	exonic UTR5	SNV	n.a. (downs.)	Alternative
4162611	128748551	GCA	G	exonic UTR5	INDEL	Class II	Canonical
4194891	128748551	G	A	exonic UTR5	SNV	Class II	Canonical
4170844	128748556	G	A	exonic UTR5	SNV	Class II	n.a.
4152036	128748557	C	G	exonic UTR5	SNV	Class II	n.a.
4182393	128748557	C	G	exonic UTR5	SNV	Class II	Canonical
4190231	128748557	C	T	exonic UTR5	SNV	Class II	n.a.
4190231	128748573	C	T	exonic UTR5	SNV	Class II	n.a.
4194891	128748587	C	T	exonic UTR5	SNV	Class II	Canonical
4182393	128748603	G	A	exonic UTR5	SNV	Class II	Canonical
4189998	128748621	C	T	exonic UTR5	SNV	Class II	Canonical
4178518	128748628	G	A	exonic UTR5	SNV	Class I	Canonical
4190231	128748629	C	T	exonic UTR5	SNV	Class II	n.a.
4190231	128748671	G	A	exonic UTR5	SNV	Class II	n.a.
4178345	128748675	C	G	exonic UTR5	SNV	Class II	Canonical
4182393	128748675	C	T	exonic UTR5	SNV	Class II	Canonical
4190231	128748678	T	C	exonic UTR5	SNV	Class II	n.a.
4178345	128748684	T	G	exonic UTR5	SNV	Class II	Canonical
4190231	128748686	G	A	splicing	SNV	Class II	n.a.
4103570	128748687	C	A	exonic UTR5	SNV	n.a. (downs.)	n.a.
4178518	128748687	C	T	exonic UTR5	SNV	Class I	Canonical
4194891	128748688	A	G	exonic UTR5	SNV	Class II	Canonical
4190495	128748694	C	T	exonic UTR5	SNV	n.a. (downs.)	Canonical
4162611	128748697	G	C	exonic UTR5	SNV	Class II	Canonical
4190231	128748697	G	A	exonic UTR5	SNV	Class II	n.a.
4194891	128748697	GCACTTTGCACTGGAA	G	exonic UTR5	INDEL	Class II	Canonical
4110498	128748707	C	G	exonic UTR5	SNV	Class II	n.a.
4127766	128748710	G	A	exonic UTR5	SNV	n.a. (downs.)	Canonical
4190231	128748713	C	G	exonic UTR5	SNV	Class II	n.a.
4190231	128748718	A	T	exonic UTR5	SNV	Class II	n.a.
4190231	128748721	A	T	exonic UTR5	SNV	Class II	n.a.
4110498	128748722	C	T	exonic UTR5	SNV	Class II	n.a.
4110498	128748723	C	A	exonic UTR5	SNV	Class II	n.a.
4110498	128748724	C	T	exonic UTR5	SNV	Class II	n.a.
4110498	128748727	G	A	exonic UTR5	SNV	Class II	n.a.
4190231	128748727	G	C	exonic UTR5	SNV	Class II	n.a.
4194891	128748727	G	C	exonic UTR5	SNV	Class II	Canonical
4119027	128748763	C	T	exonic UTR5	SNV	Class II	Canonical
4152611	128748767	C	T	exonic UTR5	SNV	Class I	n.a.
4130003	128748769	A	G	exonic UTR5	SNV	n.a. (downs.)	Canonical
4190784	128748774	G	C	exonic UTR5	SNV	Class II	n.a.
4190231	128748783	C	G	exonic UTR5	SNV	Class II	n.a.
4190231	128748784	C	G	exonic UTR5	SNV	Class II	n.a.
4152036	128748789	C	T	exonic UTR5	SNV	Class II	n.a.
4110498	128748801	C	G	exonic UTR5	SNV	Class II	n.a.
4194891	128748801	C	T	exonic UTR5	SNV	Class II	Canonical
4190231	128748802	CG	C	exonic UTR5	INDEL	Class II	n.a.
4142267	128748811	G	T	exonic UTR5	SNV	n.a. (downs.)	Canonical
4190231	128748817	C	G	exonic UTR5	SNV	Class II	n.a.
4119027	128748828	G	A	exonic UTR5	SNV	Class II	Canonical
4178518	128748828	G	C	exonic UTR5	SNV	Class I	Canonical
4186812	128748831	G	A	exonic UTR5	SNV	Class II	Canonical
4190231	128748831	G	C	exonic UTR5	SNV	Class II	n.a.
4152036	128748832	C	T	exonic UTR5	SNV	Class II	n.a.
4189998	128748832	C	T	exonic UTR5	SNV	Class II	Canonical
4189998	128748839	G	A	exonic UTR5	SNV	Class II	Canonical
4190231	128748839	G	A	exonic UTR5	SNV	Class II	n.a.
4190231	128748843	G	A	exonic coding	SNV	Class II	n.a.	exon 1		c.G4A	p.D2N	yes	Tolerated (0.46)	Benign (0.001)
4178310	128748844	A	G	exonic coding	SNV	n.a. (downs.)	Canonical	exon 1		c.A5G	p.D2G	yes	Tolerated (0.54)	Benign (0.062)
4194891	128748847	T	C	exonic coding	SNV	Class II	Canonical	exon 1		c.T8C	p.F3S	yes	Deleterious (0.02)	Benign (0.000)
4182393	128748853	G	A	exonic coding	SNV	Class II	Canonical	exon 1		c.G14A	p.R5Q	yes	Deleterious (0)	Benign (0.001)
4182393	128748855	G	T	exonic coding	SNV	Class II	Canonical	exon 1		c.G16T	p.V6L	yes	Tolerated (0.78)	Benign (0.000)
4182393	128748858	G	A	exonic coding	SNV	Class II	Canonical	exon 1		c.G19A	p.V7M	yes	Tolerated (0.13)	Benign (0.207)
4189998	128748858	G	A	exonic coding	SNV	Class II	Canonical	exon 1		c.G19A	p.V7M	yes
4190495	128748858	G	A	exonic coding	SNV	n.a. (downs.)	Canonical	exon 1		c.G19A	p.V7M	yes
4198478	128748866	C	G	exonic coding	SNV	Class I	n.a.	exon 1		c.C27G	p.N9K	yes	Tolerated (0.48)	Benign (0.000)
4130003	128748869	G	C	exonic coding	SNV	n.a. (downs.)	Canonical	exon 1		c.G30C	p.Q10H	yes	Deleterious (0.05)	Benign (0.216)
4177434	128748870	G	T	splicing	SNV	n.a. (downs.)	Alternative					yes
4178518	128748874	G	C	intronic	SNV	Class I	Canonical
4178518	128748880	A	G	intronic	SNV	Class I	Canonical
4130003	128748881	A	G	intronic	SNV	n.a. (downs.)	Canonical
4177434	128748888	T	C	intronic	SNV	n.a. (downs.)	Alternative
4198478	128748891	C	G	intronic	SNV	Class I	n.a.
4174742	128748898	A	C	intronic	SNV	Class I	n.a.
4112512	128748904	T	G	intronic	SNV	Class II	Canonical
4110498	128748910	A	T	intronic	SNV	Class II	n.a.
4194891	128748914	C	G	intronic	SNV	Class II	Canonical
4119027	128748918	A	T	intronic	SNV	Class II	Canonical
4178518	128748920	T	C	intronic	SNV	Class I	Canonical
4182393	128748921	G	A	intronic	SNV	Class II	Canonical
4194891	128748921	G	A	intronic	SNV	Class II	Canonical
4162611	128748922	C	G	intronic	SNV	Class II	Canonical
4112512	128748926	G	A	intronic	SNV	Class II	Canonical
4182393	128748926	G	C	intronic	SNV	Class II	Canonical
4119027	128748931	G	A	intronic	SNV	Class II	Canonical
4130003	128748934	G	C	intronic	SNV	n.a. (downs.)	Canonical
4110498	128748935	A	C	intronic	SNV	Class II	n.a.
4119027	128748936	A	G	intronic	SNV	Class II	Canonical
4178518	128748936	A	T	intronic	SNV	Class I	Canonical
4190231	128748936	A	G	intronic	SNV	Class II	n.a.
4110498	128748949	G	C	intronic	SNV	Class II	n.a.
4162611	128748955	T	C	intronic	SNV	Class II	Canonical
4178345	128748956	T	C	intronic	SNV	Class II	Canonical
4178518	128748958	C	G	intronic	SNV	Class I	Canonical
4182393	128748966	C	T	intronic	SNV	Class II	Canonical
4182393	128748967	C	A	intronic	SNV	Class II	Canonical
4119027	128748972	C	T	intronic	SNV	Class II	Canonical
4190231	128748972	C	T	intronic	SNV	Class II	n.a.
4190231	128748979	C	T	intronic	SNV	Class II	n.a.
4174742	128748986	C	G	intronic	SNV	Class I	n.a.
4190231	128748992	G	A	intronic	SNV	Class II	n.a.
4119027	128748995	G	C	intronic	SNV	Class II	Canonical
4127766	128748995	G	C	intronic	SNV	n.a. (downs.)	Canonical
4178310	128748995	G	C	intronic	SNV	n.a. (downs.)	Canonical
4178345	128748995	G	C	intronic	SNV	Class II	Canonical
4182393	128748995	G	C	intronic	SNV	Class II	Canonical
4190231	128748995	G	C	intronic	SNV	Class II	n.a.
4190316	128748995	G	C	intronic	SNV	Class I	n.a.
4170844	128748998	A	T	intronic	SNV	Class II	n.a.
4193278	128748998	A	C	intronic	SNV	n.a. (downs.)	Canonical
4110498	128749001	G	A	intronic	SNV	Class II	n.a.
4119027	128749001	G	T	intronic	SNV	Class II	Canonical
4182393	128749001	G	A	intronic	SNV	Class II	Canonical
4190231	128749001	G	A	intronic	SNV	Class II	n.a.
4190495	128749001	G	T	intronic	SNV	n.a. (downs.)	Canonical
4193278	128749001	G	A	intronic	SNV	n.a. (downs.)	Canonical
4162611	128749003	A	C	intronic	SNV	Class II	Canonical
4189998	128749005	C	T	intronic	SNV	Class II	Canonical
4190784	128749005	C	G	intronic	SNV	Class II	n.a.
4194891	128749005	C	G	intronic	SNV	Class II	Canonical
4190231	128749010	G	A	intronic	SNV	Class II	n.a.
4130003	128749015	G	A	intronic	SNV	n.a. (downs.)	Canonical
4162611	128749017	T	G	intronic	SNV	Class II	Canonical
4193278	128749024	T	C	intronic	SNV	n.a. (downs.)	Canonical
4178310	128749033	A	G	intronic	SNV	n.a. (downs.)	Canonical
4178518	128749033	A	G	intronic	SNV	Class I	Canonical
4162611	128749044	G	A	intronic	SNV	Class II	Canonical
4190784	128749047	A	C	intronic	SNV	Class II	n.a.
4100314	128749053	C	G	intronic	SNV	Class II	n.a.
4178518	128749061	G	C	intronic	SNV	Class I	Canonical
4190231	128749070	G	A	intronic	SNV	Class II	n.a.
4178518	128749078	C	T	intronic	SNV	Class I	Canonical
4174742	128749082	G	C	intronic	SNV	Class I	n.a.
4190231	128749084	G	T	intronic	SNV	Class II	n.a.
4190784	128749091	G	A	intronic	SNV	Class II	n.a.
4110498	128749093	A	T	intronic	SNV	Class II	n.a.
4178345	128749095	T	G	intronic	SNV	Class II	Canonical
4178518	128749096	G	A	intronic	SNV	Class I	Canonical
4178310	128749097	G	C	intronic	SNV	n.a. (downs.)	Canonical
4178518	128749109	A	G	intronic	SNV	Class I	Canonical
4100314	128749110	C	G	intronic	SNV	Class II	n.a.
4193278	128749110	C	T	intronic	SNV	n.a. (downs.)	Canonical
4178518	128749119	G	A	intronic	SNV	Class I	Canonical
4178518	128749131	A	G	intronic	SNV	Class I	Canonical
4178345	128749136	T	A	intronic	SNV	Class II	Canonical
4190231	128749136	T	A	intronic	SNV	Class II	n.a.
4190784	128749136	T	A	intronic	SNV	Class II	n.a.
4198478	128749136	T	C	intronic	SNV	Class I	n.a.
4174742	128749138	T	C	intronic	SNV	Class I	n.a.
4198478	128749145	G	A	intronic	SNV	Class I	n.a.
4103570	128749148	G	A	intronic	SNV	n.a. (downs.)	n.a.
4189998	128749150	C	A	intronic	SNV	Class II	Canonical
4190784	128749161	T	A	intronic	SNV	Class II	n.a.
4178518	128749171	C	G	intronic	SNV	Class I	Canonical
4190495	128749173	G	A	intronic	SNV	n.a. (downs.)	Canonical
4178518	128749175	T	C	intronic	SNV	Class I	Canonical
4178518	128749180	T	C	intronic	SNV	Class I	Canonical
4162611	128749184	T	A	intronic	SNV	Class II	Canonical
4178518	128749190	G	A	intronic	SNV	Class I	Canonical
4182393	128749190	G	C	intronic	SNV	Class II	Canonical
4189998	128749190	G	T	intronic	SNV	Class II	Canonical
4190495	128749190	G	A	intronic	SNV	n.a. (downs.)	Canonical
4178310	128749191	C	G	intronic	SNV	n.a. (downs.)	Canonical
4194891	128749193	C	G	intronic	SNV	Class II	Canonical
4178518	128749194	T	C	intronic	SNV	Class I	Canonical
4194218	128749245	G	A	intronic	SNV	Class I	Alternative
4100314	128749246	C	T	intronic	SNV	Class II	n.a.
4162611	128749246	C	G	intronic	SNV	Class II	Canonical
4103570	128749250	C	T	intronic	SNV	n.a. (downs.)	n.a.
4130003	128749250	C	T	intronic	SNV	n.a. (downs.)	Canonical
4182393	128749254	G	A	intronic	SNV	Class II	Canonical
4178345	128749255	C	G	intronic	SNV	Class II	Canonical
4186812	128749255	C	T	intronic	SNV	Class II	Canonical
4190231	128749255	C	T	intronic	SNV	Class II	n.a.
4190784	128749255	C	G	intronic	SNV	Class II	n.a.
4190784	128749256	T	A	intronic	SNV	Class II	n.a.
4190231	128749257	C	T	intronic	SNV	Class II	n.a.
4112512	128749262	G	A	intronic	SNV	Class II	Canonical
4189998	128749266	A	G	intronic	SNV	Class II	Canonical
4190231	128749270	A	G	intronic	SNV	Class II	n.a.
4198478	128749273	G	A	intronic	SNV	Class I	n.a.
4178345	128749290	G	C	intronic	SNV	Class II	Canonical
4189998	128749294	G	C	intronic	SNV	Class II	Canonical
4103570	128749298	G	A	intronic	SNV	n.a. (downs.)	n.a.
4178310	128749318	T	C	intronic	SNV	n.a. (downs.)	Canonical
4178518	128749341	A	G	intronic	SNV	Class I	Canonical
4162611	128749342	A	C	intronic	SNV	Class II	Canonical
4190784	128749347	C	T	intronic	SNV	Class II	n.a.
4119027	128749349	G	A	intronic	SNV	Class II	Canonical
4156551	128749349	G	C	intronic	SNV	Class I	n.a.
4177856	128749349	G	A	intronic	SNV	Class I	Canonical
4182393	128749349	G	A	intronic	SNV	Class II	Canonical
4133511	128749376	C	T	intronic	SNV	Class I	Alternative
4190231	128749378	G	T	intronic	SNV	Class II	n.a.
4178310	128749379	A	G	intronic	SNV	n.a. (downs.)	Canonical
4108627	128749407	C	A	intronic	SNV	Class I	n.a.
4178345	128749419	C	T	intronic	SNV	Class II	Canonical
4162611	128749420	C	T	intronic	SNV	Class II	Canonical
4152036	128749422	A	G	intronic	SNV	Class II	n.a.
4190784	128749422	A	C	intronic	SNV	Class II	n.a.
4182393	128749435	C	T	intronic	SNV	Class II	Canonical
4189998	128749436	T	A	intronic	SNV	Class II	Canonical
4133511	128749437	T	TTTAAGAAG	intronic	INDEL	Class I	Alternative
4182393	128749440	A	G	intronic	SNV	Class II	Canonical
4119027	128749446	T	G	intronic	SNV	Class II	Canonical
4170844	128749449	G	C	intronic	SNV	Class II	n.a.
4177856	128749449	G	C	intronic	SNV	Class I	Canonical
4177856	128749452	T	C	intronic	SNV	Class I	Canonical
4189998	128749456	G	A	intronic	SNV	Class II	Canonical
4194891	128749456	G	C	intronic	SNV	Class II	Canonical
4190784	128749464	A	T	intronic	SNV	Class II	n.a.
4190784	128749466	A	C	intronic	SNV	Class II	n.a.
4182393	128749468	G	C	intronic	SNV	Class II	Canonical
4198478	128749472	T	G	intronic	SNV	Class I	n.a.
4178518	128749484	A	G	intronic	SNV	Class I	Canonical
4152036	128749487	C	T	intronic	SNV	Class II	n.a.
4178518	128749487	C	T	intronic	SNV	Class I	Canonical
4152036	128749488	C	T	intronic	SNV	Class II	n.a.
4178518	128749488	C	T	intronic	SNV	Class I	Canonical
4110498	128749489	T	G	intronic	SNV	Class II	n.a.
4177856	128749491	G	A	intronic	SNV	Class I	Canonical
4178518	128749492	G	A	intronic	SNV	Class I	Canonical
4103570	128749508	G	A	intronic	SNV	n.a. (downs.)	n.a.
4193278	128749515	G	A	intronic	SNV	n.a. (downs.)	Canonical
4162611	128749521	G	A	intronic	SNV	Class II	Canonical
4152036	128749524	A	G	intronic	SNV	Class II	n.a.
4163741	128749526	G	A	intronic	SNV	Class I	Alternative
4103570	128749554	A	G	intronic	SNV	n.a. (downs.)	n.a.
4110498	128749554	A	G	intronic	SNV	Class II	n.a.
4190231	128749554	A	G	intronic	SNV	Class II	n.a.
4152036	128749564	T	A	intronic	SNV	Class II	n.a.
4177856	128749586	GA	G	intronic	INDEL	Class I	Canonical
4119027	128749592	C	T	intronic	SNV	Class II	Canonical
4170844	128749592	C	T	intronic	SNV	Class II	n.a.
4194218	128749607	G	A	intronic	SNV	Class I	Alternative
4127766	128749611	C	T	intronic	SNV	n.a. (downs.)	Canonical
4119027	128749650	C	T	intronic	SNV	Class II	Canonical
4190231	128749674	T	C	intronic	SNV	Class II	n.a.
4194891	128749679	G	A	intronic	SNV	Class II	Canonical
4177856	128749683	C	T	intronic	SNV	Class I	Canonical
4152036	128749686	G	A	intronic	SNV	Class II	n.a.
4186812	128749706	C	T	intronic	SNV	Class II	Canonical
4119027	128749775	C	T	intronic	SNV	Class II	Canonical
4125240	128749777	G	A	intronic	SNV	Class I	Alternative
4194218	128749799	C	T	intronic	SNV	Class I	Alternative
4119027	128749812	T	A	intronic	SNV	Class II	Canonical
4146289	128749828	A	C	intronic	SNV	Class I	Alternative
4119027	128749842	G	A	intronic	SNV	Class II	Canonical
4178310	128749860	G	C	intronic	SNV	n.a. (downs.)	Canonical
4170844	128749892	A	C	intronic	SNV	Class II	n.a.
4189998	128749899	G	T	intronic	SNV	Class II	Canonical
4190784	128749924	G	A	intronic	SNV	Class II	n.a.
4156551	128749927	C	T	intronic	SNV	Class I	n.a.
4119027	128749932	G	A	intronic	SNV	Class II	Canonical
4110498	128749971	G	A	intronic	SNV	Class II	n.a.
4152036	128750000	G	C	intronic	SNV	Class II	n.a.
4190231	128750000	G	A	intronic	SNV	Class II	n.a.
4178345	128750053	G	A	intronic	SNV	Class II	Canonical		exon 2a
4178345	128750054	T	C	intronic	SNV	Class II	Canonical		exon 2a
4162611	128750083	C	T	intronic	SNV	Class II	Canonical		exon 2a
4162611	128750087	C	G	intronic	SNV	Class II	Canonical		exon 2a
4178310	128750087	C	G	intronic	SNV	n.a. (downs.)	Canonical		exon 2a
4110498	128750108	A	G	intronic	SNV	Class II	n.a.		exon 2a
4178310	128750110	A	G	intronic	SNV	n.a. (downs.)	Canonical		exon 2a
4178518	128750162	G	A	intronic	SNV	Class I	Canonical		exon 2a
4146289	128750280	C	G	intronic	SNV	Class I	Alternative		exon 2a
4178345	128750282	C	G	intronic	SNV	Class II	Canonical		exon 2a
4178345	128750295	C	T	intronic	SNV	Class II	Canonical		exon 2a
4189998	128750298	G	A	intronic	SNV	Class II	Canonical		exon 2a
4190784	128750302	G	A	intronic	SNV	Class II	n.a.		exon 2a
4108627	128750303	C	A	intronic	SNV	Class I	n.a.		exon 2a
4177856	128750325	G	A	intronic	SNV	Class I	Canonical		exon 2a
4164943	128750345	C	T	intronic	SNV	Class I	n.a.		exon 2a
4174742	128750352	C	T	intronic	SNV	Class I	n.a.		exon 2a
4110996	128750361	C	G	intronic	SNV	Class I	Alternative		exon 2a
4146289	128750365	C	T	intronic	SNV	Class I	Alternative		exon 2a
4152036	128750365	C	G	intronic	SNV	Class II	n.a.		exon 2a
4161696	128750365	C	T	intronic	SNV	Class I	n.a.		exon 2a
4182393	128750365	C	T	intronic	SNV	Class II	Canonical		exon 2a
4194218	128750379	A	T	intronic	SNV	Class I	Alternative		exon 2a
4108627	128750380	G	A	intronic	SNV	Class I	n.a.		exon 2a
4178518	128750380	G	A	intronic	SNV	Class I	Canonical		exon 2a
4110498	128750393	A	G	intronic	SNV	Class II	n.a.		exon 2a
4182393	128750457	C	G	intronic	SNV	Class II	Canonical		exon 2a
4158769	128750468	C	G	intronic	SNV	Class I	n.a.		exon 2a
4146289	128750471	C	T	intronic	SNV	Class I	Alternative		exon 2a
4198478	128750481	T	G	intronic	SNV	Class I	n.a.		exon 2a
4158769	128750512	C	T	exonic coding	SNV	Class I	n.a.	exon 2	exon 2	c.C49T	p.P17S	yes	Tolerated (0.07)	Probably damaging (0.998)
4152611	128750535	C	G	exonic coding	SNV	Class I	n.a.	exon 2	exon 2	c.C72G	p.N24K	yes	Tolerated (0.25)	Possibly damaging (0.629)
4158769	128750537	G	A	exonic coding	SNV	Class I	n.a.	exon 2	exon 2	c.G74A	p.R25K	yes	Tolerated (1)	Benign (0.001)
4178518	128750542	T	A	exonic coding	SNV	Class I	Canonical	exon 2	exon 2	c.T79A	p.Y27N	yes	Tolerated (1)	Probably damaging (0.998)
4189998	128750543	A	G	exonic coding	SNV	Class II	Canonical	exon 2	exon 2	c.A80G	p.Y27C	yes	Tolerated (0.12)	Probably damaging (0.998)
4189998	128750554	T	C	exonic coding	SNV	Class II	Canonical	exon 2	exon 2	c.T91C	p.Y31H	yes	Deleterious (0.01)	Probably damaging (0.999)
4170844	128750569	C	T	exonic coding	SNV	Class II	n.a.	exon 2	exon 2	c.C106T	p.P36S	yes	Tolerated (0.46)	Probably damaging (1)
4133511	128750595	G	C	exonic coding	SNV	Class I	Alternative	exon 2	exon 2	c.G132C	p.E44D	yes	Deleterious (0.0)	Probably damaging (0.663)
4178518	128750599	T	C	exonic coding	SNV	Class I	Canonical	exon 2	exon 2	c.T136C	p.F46L	yes	Tolerated (0.35)	Probably damaging (0.664)
4178518	128750610	G	C	exonic coding	SNV	Class I	Canonical	exon 2	exon 2	c.G147C	p.Q49H	yes	Tolerated (0.17)	Benign (0.009)
4194218	128750610	G	C	exonic coding	SNV	Class I	Alternative	exon 2	exon 2	c.G147C	p.Q49H	yes
4194218	128750612	A	T	exonic coding	SNV	Class I	Alternative	exon 2	exon 2	c.A149T	p.Q50L	yes	Tolerated (0.51)	Possibly damaging (0.955)
4178518	128750625	G	T	exonic coding	SNV	Class I	Canonical	exon 2	exon 2	c.G162T	p.E54D	yes	Tolerated (0.71)	Benign (0.056)
4178345	128750639	C	T	exonic coding	SNV	Class II	Canonical	exon 2	exon 2	c.C176T	p.A59V	yes	Tolerated (0.76)	Probably damaging (1)
4164943	128750677	C	A	exonic coding	SNV	Class I	n.a.	exon 2	exon 2	c.C214A	p.P72T	yes	Tolerated (0.13)	Probably damaging (0.995)
4190316	128750677	C	G	exonic coding	SNV	Class I	n.a.	exon 2	exon 2	c.C214G	p.P72A	yes	Tolerated (0.28)	Probably damaging (0.974)
4177856	128750677	C	T	exonic coding	SNV	Class I	Canonical	exon 2	exon 2	c.C214T	p.P72S	yes
4190316	128750678	C	T	exonic coding	SNV	Class I	n.a.	exon 2	exon 2	c.C215T	p.P72L	yes	Tolerated (1)	Probably damaging (0.999)
4163741	128750680	A	G	exonic coding	SNV	Class I	Alternative	exon 2	exon 2	c.A217G	p.T73A	yes	Deleterious (0)	Possible damaging (0.663)
4164943	128750680	A	G	exonic coding	SNV	Class I	n.a.	exon 2	exon 2	c.A217G	p.T73A	yes
4162611	128750681	C	T	exonic coding	SNV	Class II	Canonical	exon 2	exon 2	c.C218T	p.T73I	yes	Deleterious (0)	Probably damaging (0.981)
4108627	128750683	C	T	exonic coding	SNV	Class I	n.a.	exon 2	exon 2	c.C220T	p.P74S	yes	Tolerated (0.46)	Probably damaging (1)
4190495	128750683	C	T	exonic coding	SNV	n.a. (downs.)	Canonical	exon 2	exon 2	c.C220T	p.P74S	yes
4142267	128750686	C	G	exonic coding	SNV	n.a. (downs.)	Canonical	exon 2	exon 2	c.C223G	p.P75A	yes	Tolerated (1)	Probably damaging (0.998)
4178518	128750695	C	A	exonic coding	SNV	Class I	Canonical	exon 2	exon 2	c.C232A	p.P78T	yes	Tolerated (0.18)	Probably damaging (1)
4152611	128750738	T	G	exonic coding	SNV	Class I	n.a.	exon 2	exon 2	c.T275G	p.V92G	no	Tolerated (0.39)	Benign (0.00)
4164943	128750783	G	A	exonic coding	SNV	Class I	n.a.	exon 2	exon 2	c.G320A	p.S107N	no	Tolerated (0.21)	Benign (0.00)
4198478	128750783	G	A	exonic coding	SNV	Class I	n.a.	exon 2	exon 2	c.G320A	p.S107N	no
4162611	128750803	C	G	exonic coding	SNV	Class II	Canonical	exon 2	exon 2	c.C340G	p.L114V	no	Tolerated (0.49)	Probably damaging (0.99)
4198478	128750857	T	A	exonic coding	SNV	Class I	n.a.	exon 2	exon 2	c.T394A	p.C132S	no	Tolerated (0.76)	Possible damaging (0.833)
4152611	128750921	T	C	exonic coding	SNV	Class I	n.a.	exon 2	exon 2	c.T458C	p.F153S	no	Tolerated (0.53)	Probably damaging (0.991)
4156551	128750921	T	C	exonic coding	SNV	Class I	n.a.	exon 2	exon 2	c.T458C	p.F153S	no
4158769	128750921	T	C	exonic coding	SNV	Class I	n.a.	exon 2	exon 2	c.T458C	p.F153S	no
4133511	128750953	C	G	exonic coding	SNV	Class I	Alternative	exon 2	exon 2	c.C490G	p.L164V	no	Deleterious (0)	Benign (0.267)
4146289	128750953	C	G	exonic coding	SNV	Class I	Alternative	exon 2	exon 2	c.C490G	p.L164V	no
4161696	128750953	C	G	exonic coding	SNV	Class I	n.a.	exon 2	exon 2	c.C490G	p.L164V	no
4170844	128750953	C	G	exonic coding	SNV	Class II	n.a.	exon 2	exon 2	c.C490G	p.L164V	no
4186812	128750953	C	G	exonic coding	SNV	Class II	Canonical	exon 2	exon 2	c.C490G	p.L164V	no
4198478	128750953	C	G	exonic coding	SNV	Class I	n.a.	exon 2	exon 2	c.C490G	p.L164V	no
4198478	128751033	C	G	exonic coding	SNV	Class I	n.a.	exon 2	exon 2	c.C570G	p.S190R	no	Tolerated (0.07)	Probably damaging (0.975)
4108627	128751053	G	A	exonic coding	SNV	Class I	n.a.	exon 2	exon 2	c.G590A	p.S197N	yes	Tolerated (0.35)	Benign (0.001)
4178518	128751053	G	A	exonic coding	SNV	Class I	Canonical	exon 2	exon 2	c.G590A	p.S197N	yes
4110996	128751113	G	C	exonic coding	SNV	Class I	Alternative	exon 2	exon 2	c.G650C	p.S217T	yes	Tolerated (0.89)	Benign (0.067)
4190231	128751226	C	T	exonic coding	SNV	Class II	n.a.	exon 2	exon 2	c.C763T	p.L255F	yes	Tolerated (0.16)	Probably damaging (0.998)
4152611	128751242	C	T	exonic coding	SNV	Class I	n.a.	exon 2	exon 2	c.C779T	p.P260L	yes	Tolerated (0.19)	Probably damaging (0.976)
4198478	128751245	C	G	exonic coding	SNV	Class I	n.a.	exon 2	exon 2	c.C782G	p.P261R	no	Tolerated (0.11)	Probably damaging (0.999)
4164943	128751254	G	T	exonic coding	SNV	Class I	n.a.	exon 2	exon 2	c.G791T	p.S264I	no	Tolerated (0.13)	Probably damaging (0.994)
4194218	128751254	G	A	exonic coding	SNV	Class I	Alternative	exon 2	exon 2	c.G791A	p.S264N	no	Tolerated (0.71)	Possibly damaging (0.939)
4178518	128751292	A	G	intronic	SNV	Class I	Canonical
4158769	128751312	C	G	intronic	SNV	Class I	n.a.
4161696	128751317	C	A	intronic	SNV	Class I	n.a.
4198478	128751322	T	C	intronic	SNV	Class I	n.a.
4178518	128751341	A	C	intronic	SNV	Class I	Canonical
4108627	128751372	C	T	intronic	SNV	Class I	n.a.
4146289	128751412	T	C	intronic	SNV	Class I	Alternative
4164943	128751437	C	G	intronic	SNV	Class I	n.a.
4146289	128751496	G	A	intronic	SNV	Class I	Alternative
4198478	128751652	C	T	intronic	SNV	Class I	n.a.
4198478	128751666	T	C	intronic	SNV	Class I	n.a.
4146289	128751797	T	C	intronic	SNV	Class I	Alternative
4198478	128751863	T	A	intronic	SNV	Class I	n.a.
4177856	128751971	G	A	intronic	SNV	Class I	Canonical
4108627	128752017	A	G	intronic	SNV	Class I	n.a.
4198478	128752131	T	C	intronic	SNV	Class I	n.a.
4198478	128752155	T	C	intronic	SNV	Class I	n.a.
4198478	128752267	A	G	intronic	SNV	Class I	n.a.
4146289	128752393	TG	T	intronic	INDEL	Class I	Alternative
4163741	128752469	G	A	intronic	SNV	Class I	Alternative
4146289	128752635	C	T	intronic	SNV	Class I	Alternative
Patient ID	Start	gene1	Site1	End	gene2	Break in MYC	MYC_ mRNA			Site	SV_type	PTMs close region
4178518	128748607	MYC	exonic UTR5	128748654	MYC	Class I	Canonical			exonic UTR5	Dup
4103570	128749407	MYC	intron1-2	128749470	MYC	n.a. (downs.)	n.a.			intron1-2	Del
4100314	128748857	MYC	exon 1 coding	128748977	MYC	Class II	n.a.			Intron1-2	Del	yes
4189998	128748663	MYC	exonic UTR5	128748696	MYC	Class II	Canonical			exonic UTR5	Dup
	128749033	MYC	intron1-2	128749141	MYC	Class II	Canonical			intron1-2	Dup
	128750653	MYC	exon 2 coding	128750768	MYC	Class II	Canonical			exon 2 coding	Del	yes
4127766	128691411			128889562	PVT1	downstream	Canonical				Inv
Ref.: reference; Alt.: alteration; UTR: untranslated region; SV: structural variant; Dup: Duplication; Del: Deletion; Inv: inversion
CDS: coding sequence; PTMs: post-translational modifications; SIFT: sorting intolerant from tolerant; PolyPhen-2: polymorphism phenotyping

## Sheet: Tabelle1
4190784	ok
4189998	ok
4190231	ok
4182393	ok
4162611	ok
4194891	ok
4170844	ok
4152036	ok
4178345	ok
4110498	ok
4119027	ok
4186812	ok
4112512	ok
4100314	ok
4146289
