# Supplementary material for: Genomic and transcriptomic changes complement each other in the pathogenesis of sporadic Burkitt lymphoma
Source: Nat Commun. 2019 Mar 29;10:1459. doi: 10.1038/s41467-019-08578-3 (PMC6440956; doi:10.1038/s41467-019-08578-3)
Supplement: Supplementary file 9 — Supplementary Data 6 [file 41467_2019_8578_MOESM9_ESM.xlsx]

## Sheet: Tabelle3 (3)
Supplementary Data 6. Validation of somatic and germline SNVs using PCR and Sanger sequencing.
Gene	Chr.	Pos.	Ref.	Alt.	VAF	ICGC-case	somatic/germline	Classification	Published previously	Annovar Function	Annovar_Transcript	Variant type	Exonic_classification	CDS position	Protein change	UMD_prediction	Human Splicing Finder
ARID1A	1	27100360	C	T	0.44	4193278	somatic	solBL	yes1	exonic	ENST00000324856	SNV	stopgain	c.C4072T	p.Q1358X	pathogenic	.
ARID1A	1	27101300	C	T	0.48	4182393	somatic	solBL	yes1	exonic	ENST00000324856	SNV	stopgain	c.C4582T	p.R1528X	pathogenic	.
ID3	1	23885511	C	T	0.63	4182393	somatic	solBL	yes1	splicing	ENST00000374561	SNV	n.a.	c.301-1G>A	n.a.	n.a.	New ESE site
ID3	1	23885616	A	G	0.49	4190495	somatic	solBL	yes1	splicing	ENST00000374561	SNV	n.a.	c.300+2T>C	n.a.	n.a.	ESS Site broken; New ESE site
ID3	1	23885677	G	A	0.3	4182393	somatic	solBL	yes1	exonic	ENST00000374561	SNV	stopgain	c.C241T	p.Q81*	pathogenic	.
ID3	1	23885677	G	A	0.44	4190495	somatic	solBL	yes1	exonic	ENST00000374561	SNV	stopgain	c.C241T	p.Q81*	pathogenic	.
MEGF6	1	3428569	C	T	0.64	4125240	somatic	solBL	yes1	splicing	ENST00000356575	SNV	n.a.	c.976+1G>A	n.a.	n.a.	Alteration of WT donor site
NHLH1	1	160340768	C	T	0.59	4125240	somatic	solBL	no	exonic	ENST00000302101	SNV	stopgain	c.C247T	p.R83X	pathogenic	.
NRAS	1	115258747	C	T	0.51	4178345	somatic	leukBL	no	exonic	ENST00000369535	SNV	nonsynonymous	c.G35A	p.G12D	pathogenic	.
FBXO11	2	48036837	A	T	0.70	4182393	somatic	solBL	yes1	exonic	ENST00000402508	SNV	nonsynonymous	c.T2096A	p.I699N	pathogenic	.
FBXO11	2	48045966	A	G	0.46	4125240	somatic	solBL	yes1	exonic	ENST00000402508	SNV	nonsynonymous	c.T1706C	p.L569P	pathogenic	.
PCBP1	2	70314912	ACT	A	0.36	4193278	somatic	solBL	yes2	exonic	ENST00000303577	INDEL	frameshift deletion	c.38_39del	p.T13fs	n.a.	.
PCBP1	2	70315424	C	T	0.64	4127766	somatic	solBL	yes2	exonic	ENST00000303577	SNV	stopgain	c.C550T	p.Q184X	pathogenic	.
PCBP1	2	70315475	G	GT	0.49	4177434	somatic	solBL	yes2	exonic	ENST00000303577	INDEL	frameshift insertion	c.601dupT	p.C201fs	n.a.	.
GNAI2	3	50293695	G	A	0.48	4190495	somatic	solBL	no	exonic	ENST00000313601	SNV	nonsynonymous	c.G536A	p.R179H	pathogenic	.
GNAI2	3	50293695	G	A	0.47	4178310	somatic	leukBL	no	exonic	ENST00000313601	SNV	nonsynonymous	c.G536A	p.R179H	pathogenic	.
GNAI2	3	50294455	CAAG	C	0.35	4177856	somatic	solBL	no	exonic	ENST00000313601	INDEL	nonframeshift deletion	c.811_813del	p.271_271del	n.a.	.
RHOA	3	49405911	T	A	0.64	4133511	somatic	solBL	no	exonic	ENST00000418115	SNV	nonsynonymous	c.A227T	p.D76V	pathogenic	.
RHOA	3	49405932	A	C	0.36	4133511	somatic	solBL	no	exonic	ENST00000418115	SNV	nonsynonymous	c.T206G	p.L69R	pathogenic	.
RHOA	3	49412898	T	A	0.95	4112512	somatic	solBL	no	exonic	ENST00000418115	SNV	nonsynonymous	c.A125T	p.Y42F	pathogenic	.
RHOA	3	49412955	A	C	0.54	4190495	somatic	solBL	yes1	exonic	ENST00000418115	SNV	nonsynonymous	c.T68G	p.I23R	pathogenic	.
RHOA	3	49413009	C	T	0.57	4119027	somatic	solBL	yes1	exonic	ENST00000418115	SNV	nonsynonymous	c.G14A	p.R5Q	pathogenic	.
RHOA	3	49413009	C	T	0.35	4190495	somatic	solBL	yes1	exonic	ENST00000418115	SNV	nonsynonymous	c.G14A	p.R5Q	pathogenic	.
RHOA	3	49413009	C	T	0.57	4189998	somatic	solBL	no	exonic	ENST00000418115	SNV	nonsynonymous	c.G14A	p.R5Q	pathogenic	.
HNRNPD	4	83294618	T	A	0.38	4190495	somatic	solBL	yes2	exonic	ENST00000313899	SNV	stopgain	c.A214T	p.K72X	pathogenic	.
SMARCA5	4	144446627	G	A	0.35	4193278	somatic	solBL	no	exonic	ENST00000283131	SNV	nonsynonymous	c.G544A	p.D182N	pathogenic	.
CSNK1A1	5	148904672	T	C	0.63	4190495	somatic	solBL	yes1	exonic	ENST00000377843	SNV	nonsynonymous	c.A293G	p.E98G	pathogenic	.
CCND3	6	41903688	A	T	0.59	4125240	somatic	solBL	yes1	exonic	ENST00000372991	SNV	nonsynonymous	c.T869A	p.I290K	pathogenic	.
DPCR1	6	30916653	C	T	0.70	4190495	somatic	solBL	yes1	exonic	ENST00000462446	SNV	nonsynonymous	c.C412T	p.R138C	polymorphism	.
KCNQ1OT1	11	2643537	T	G	0.57	4133511	somatic	solBL	no	ncRNA_exonic	n.a.	SNV	n.a.	n.a.	n.a.	n.a.	.
KCNQ1OT1	11	2692545	TGGCTG	T	0.90	4125240	somatic	solBL	no	ncRNA_exonic	n.a.	INDEL	n.a.	n.a.	n.a.	n.a.	.
KCNQ1OT1	11	2717147	G	A	0.45	4133511	somatic	solBL	no	ncRNA_exonic	n.a.	SNV	n.a.	n.a.	n.a.	n.a.	.
SIN3A	15	75715017	G	A	0.40	4119027	somatic	solBL	yes1	exonic	ENST00000394947	SNV	stopgain	c.C337T	p.Q113X	pathogenic	.
CREBBP	16	3789616	G	A	0.75	4125240	somatic	solBL	yes1	exonic	ENST00000262367	SNV	stopgain	c.C4243T	p.Q1415X	pathogenic	.
SF3B3	16	70575659	C	A	0.40	4182393	somatic	solBL	yes2	exonic	ENST00000302516	SNV	nonsynonymous	c.C1155A	p.F385L	pathogenic	.
GNA13	17	63010442	C	CGGAT	0.18	4194891	somatic	solBL	no	exonic	ENST00000439174	INDEL	frameshift insertion	c.1065_1066insATCC	p.R356fs	n.a.	.
GNA13	17	63010628	T	C	0.76	4142267	somatic	leukBL	no	exonic	ENST00000439174	SNV	nonsynonymous	c.A881G	p.D294G	pathogenic	.
TP53	17	7578204	A	C	0.96	4125240	somatic	solBL	yes1	exonic	ENST00000269305	SNV	nonsynonymous	c.T645G	p.S215R	pathogenic	.
TP53	17	7578415	A	T	0.54	4119027	somatic	solBL	yes1	exonic	ENST00000269305	SNV	nonsynonymous	c.T645G	p.S215R	pathogenic	.
ROCK1	18	18625301	T	C	0.16	4182393	somatic	solBL	yes1	exonic	ENST00000399799	SNV	nonsynonymous	c.A542G	p.E181G	pathogenic	.
ARHGEF1	19	42402736	G	A	0.45	4190784	somatic	leukBL	no	exonic	ENST00000354532	SNV	nonsynonymous	c.G1267A	p.E423K	pathogenic	.
ARHGEF1	19	42409355	G	A	0.67	4161696	somatic	leukBL	no	exonic	ENST00000354532	SNV	nonsynonymous	c.G2278A	p.G760R	pathogenic	.
SMARCA4	19	11105679	T	C	0.71	4125240	somatic	solBL	yes3	splicing	ENST00000358026	SNV	n.a.	c.1593+2T>C	n.a.	n.a.	ESS Site broken New ESE site
SMARCA4	19	11134251	C	T	0.47	4194218	somatic	solBL	yes3	exonic	ENST00000429416	SNV	nonsynonymous	c.C2917T	p.R973W	pathogenic	.
SMARCA4	19	11134252	G	A	0.46	4182393	somatic	solBL	yes3	exonic	ENST00000429416	SNV	nonsynonymous	c.G2918A	p.R973Q	pathogenic	.
SMARCA4	19	11134252	G	A	0.64	4194891	somatic	solBL	yes3	exonic	ENST00000429416	SNV	nonsynonymous	c.G2918A	p.R973Q	pathogenic	.
SMARCA4	19	11134254	C	T	0.58	4127766	somatic	solBL	yes3	exonic	ENST00000429416	SNV	nonsynonymous	c.C2920T	p.P974S	pathogenic	.
SMARCA4	19	11134275	A	G	0.65	4146289	somatic	solBL	yes3	exonic	ENST00000429416	SNV	nonsynonymous	c.A2941G	p.K981E	pathogenic	.
SMARCA4	19	11141498	G	A	0.61	4108627	somatic	leukBL	?	exonic	ENST00000429416	SNV	nonsynonymous	c.G3475A	p.G1159R	pathogenic	.
SMARCA4	19	11144113	G	A	0.59	4177856	somatic	solBL	yes3	exonic	ENST00000429416	SNV	nonsynonymous	c.G3694A	p.G1232S	pathogenic	.
SMARCA4	19	11144146	C	T	0.40	4112512	somatic	solBL	yes3	exonic	ENST00000429416	SNV	nonsynonymous	c.C3727T	p.R1243W	pathogenic	.
SNRPB2	20	16718013	GACTGC	G	0.78	4142267	somatic	leukBL	yes2	exonic	ENST00000377943	INDEL	frameshift deletion	c.346_350del	p.116_117del	n.a.	.
SMARCB1	22	24176335	A	G	0.44	4189998	somatic	solBL	no	exonic	ENST00000263121.7	SNV	nonsynonymous	c.A1126G	p.R376G	pathogenic	.
DDX3X	X	41196720	T	C	1	4189998	somatic	solBL	no	splicing	ENST00000399959	SNV	n.a.	c.103+2T>C	n.a.	n.a.	no impact
DDX3X	X	41203383	T	G	0.99	4190495	somatic	solBL	no	splicing	ENST00000399959	SNV	n.a.	c.864+2T>G	n.a.	n.a.	New ESS site
DDX3X	X	41205564	CG	C	1	4146289	somatic	solBL	no	exonic	ENST00000399959	INDEL	frameshift deletion	c.1399delG	p.A467fs	n.a.	.
DDX3X	X	41205590	G	A	0.90	4182393	somatic	solBL	no	exonic	ENST00000399959.2	SNV	nonsynonymous	c.G1424A	p.R475H	pathogenic	.
DDX3X	X	41205794	CAT	C	0.99	4177856	somatic	solBL	no	exonic	ENST00000399959.2	INDEL	frameshift deletion	c.1535_1536del	p.512_512del	n.a.	.
P2RY8	X	1584604	C	T	0.83	4125240	somatic	solBL	no	exonic	ENST00000381297	SNV	nonsynonymous	c.G848A	p.C283Y	pathogenic	.
P2RY8	X	1584907	G	A	0.66	4127766	somatic	solBL	no	exonic	ENST00000381297	SNV	nonsynonymous	c.C545T	p.T182M	polymorphism	.
P2RY8	X	1584955	GGGTA	G	0.20	4177856	somatic	solBL	no	exonic	ENST00000381297	SNV	frameshift deletion	c.493_496del	p.165_166del	n.a.	.
P2RY8	X	1585075	A	G	0.29	4130003	somatic	solBL	no	exonic	ENST00000381297	SNV	nonsynonymous	c.T377C	p.L126P	polymorphism	.
BLM	15	91304138	G	GA	n.a.	4177434	germline	solBL	no	exonic	ENST00000355112.3	INDEL	frameshift duplication	c.1544dupA	p.Asn515LysfsTer2	pathogenic	.
BLM	15	91304245	C	T	n.a.	4177434	germline	solBL	no	exonic	ENST00000355112.3	SNV	stopgain	c.C1642T	p.Gln548Ter	pathogenic	.
CHEK2	22	29091856	AG	A	n.a.	4182393	germline	solBL	no	exonic	ENST00000382580.2	INDEL	frameshift deletion	c.1229delC	p.Thr410MetfsTer15	pathogenic	.
FANCG	9	35079512	G	A	n.a.	4182393	germline	solBL	no	exonic	ENST00000378643.3	SNV	stopgain	c.C10T	p.Gln4Ter	n.a.	.
1Richter et al., 2013; 2Wagener et al., 2015; 3Kretzmer et al., 2015
n.a.: not available; chr.: chromosome; Ref. Reference; Alt.: alteration; MAF: minor allele frequency					VAF: variant allele frequency
solBL: solid BL; leukBL: leukemia BL, pleuraBL: pleura BL
CDS: coding sequence; SNV: single nucleotide variant; INDEL: insertion/deletion
